# Supplementary material
Source: publisher site journal article supplement (https://www.dovepress.com/article/417764)
Supplement: Supplementary file 1 [file get_supplementary_file.php]

**Supplementary Table 1** Comparison of the days of treatment course of different intravenous antibiotics between different age groups

| Age group | Amoxicillin-clavulanic acid | |  | Cefathiamidine | |  | Cefuroxime | |
| --- | --- | --- | --- | --- | --- | --- | --- | --- |
| Days of IV antibiotic  therapy (P25,P75) | *p** | Days of IV antibiotic  therapy (P25,P75) | *p** | Days of IV antibiotic  therapy (P25,P75) | *p** |
| <12months | (6,8) | 0.69 |  | (6,7) | 0.11 |  | (4.75,7) | 0.54 |
| ≥12months | (6,7) |  |  | (6,8) |  |  | (6,7) |  |
| <24months | (6,7) | 0.29 |  | (6,7) | 0.62 |  | (6,7) | 0.62 |
| ≥24months | (6,7.25) |  |  | (6,8) |  |  | (6,7) |  |
| <36months | (6,7) | 0.95 |  | (6,7） | 0.31 |  | (6,7) | 0.92 |
| ≥36months | (5.25,7) |  |  | (6,7) |  |  | (6,7) |  |
| <48months | (6,7) | 0.39 |  | (6,7.5) | 0.1 |  | (6,7) | 0.54 |
| ≥48months | (5,7.75) |  |  | (5,7) |  |  | (5.75,7) |  |
| <60months | (6,7) | 0.004 |  | (6,7.5) | <0.0001 |  | (6,7) | 0.002 |
| ≥60months | (5,6) |  |  | (5,6) |  |  | (5,6) |  |

**Note:** * Mann-Whitney U test was used to analyze the differences between different age groups.

**Abbreviations:** IV, intravenous; P25, 25th percentile; P75, 75th percentile.

**Supplementary Table 2** MIC results of different antibiotics in the *Staphylococcus aureus* clinical strains (n=13)

| Strain | Levofloxacin | |  | Erythromycin | |  | Tetracycline | |  | Clindamycin | |  | Oxacillin | |  | Penicillin G | |  | Vancomycin | |  | Mupirocin | |
| --- | --- | --- | --- | --- | --- | --- | --- | --- | --- | --- | --- | --- | --- | --- | --- | --- | --- | --- | --- | --- | --- | --- | --- |
| MIC (μg/mL) | results |  | MIC (μg/mL) | results |  | MIC (μg/mL) | results |  | MIC (μg/mL) | results |  | MIC (μg/mL) | results |  | MIC (μg/mL) | results |  | MIC (μg/mL) | results |  | MIC (μg/mL) | results |
| 1 | 8 | R |  | 8 | R |  | 2 | S |  | 4 | R |  | 1 | S |  | 0.5 | R |  | 1 | S |  | 1 | S |
| 2 | 0.125 | S |  | 16 | R |  | 1 | S |  | 4 | R |  | 1 | S |  | 1 | R |  | 0.5 | S |  | 0.5 | S |
| 3 | 0.25 | S |  | 16 | R |  | 16 | R |  | 8 | R |  | 4 | R |  | 1 | R |  | 1 | S |  | 1 | S |
| 4 | 0.125 | S |  | 8 | R |  | 1 | S |  | 8 | R |  | 2 | S |  | 0.5 | R |  | 0.25 | S |  | 0.5 | S |
| 5 | 0.25 | S |  | 8 | R |  | 1 | S |  | 8 | R |  | 1 | S |  | 0.25 | R |  | 1 | S |  | 2 | S |
| 6 | 0.25 | S |  | 8 | R |  | 0.5 | S |  | 16 | R |  | 1 | S |  | 0.5 | R |  | 0.25 | S |  | 0.5 | S |
| 7 | 0.25 | S |  | 8 | R |  | 32 | R |  | 4 | R |  | 8 | R |  | 0.25 | R |  | 0.5 | S |  | 0.5 | S |
| 8 | 0.5 | S |  | 8 | R |  | 4 | S |  | 4 | R |  | 0.5 | S |  | 1 | R |  | 2 | S |  | 2 | S |
| 9 | 0.25 | S |  | 16 | R |  | 4 | S |  | 0.25 | S |  | 0.25 | S |  | 2 | R |  | 1 | S |  | 1 | S |
| 10 | 0.125 | S |  | 32 | R |  | 32 | R |  | 8 | R |  | 0.5 | S |  | 0.5 | R |  | 1 | S |  | 1 | S |
| 11 | 8 | R |  | 8 | R |  | 16 | R |  | 4 | R |  | 1 | S |  | 0.5 | R |  | 0.5 | S |  | 0.5 | S |
| 12 | 0.25 | S |  | 8 | R |  | 2 | S |  | 16 | R |  | 1 | S |  | 1 | R |  | 1 | S |  | 2 | S |
| 13 | 0.5 | S |  | 8 | R |  | 1 | S |  | 4 | R |  | 2 | S |  | 1 | R |  | 0.5 | S |  | 0.5 | S |

**Note:** The breakpoints of MICs of different antibiotics are as follows: levofloxacin: sensitive: MIC ≤1µg/mL, resistance: MIC ≥4µg/mL; erythromycin: sensitive: MIC ≤0.5µg/mL, resistance: MIC ≥8µg/mL; tetracycline: sensitive: MIC ≤4µg/mL, resistance: MIC ≥16µg/mL; clindamycin: sensitive: MIC ≤0.5µg/mL, resistance: MIC ≥4µg/mL; oxacillin: sensitive: MIC ≤2µg/mL, resistance: MIC ≥4µg/mL; penicillin G: sensitive: MIC ≤0.12µg/mL, resistance: MIC ≥0.25µg/mL; vancomycin: sensitive: MIC ≤2µg/mL, resistance: MIC ≥16µg/mL; mupirocin: sensitive: MIC ≤4µg/mL, resistance: MIC ≥8µg/mL.

**Abbreviations:** MIC, minimal inhibitory concentration; R, resistant; S, sensitive.
